# Supplementary material for: Age of heart disease presentation and dysmorphic nuclei in patients with LMNA mutations
Source: PLoS One. 2017 Nov 17;12(11):e0188256. doi: 10.1371/journal.pone.0188256 (PMC5693421; doi:10.1371/journal.pone.0188256)
Supplement: S1 Code — The detailed description of the code is provided in S1 Text. (M) [file pone.0188256.s002.m]

%                           NUCLEIDETECT 
%
% Arguments: 
%     If analyzing new images:
%            .tiff image file FILENAME.tif of DAPI stained cardiac tissue
%
% Returns: 
%            Figure of image with nuclei labeled and outlined and the 
%            orientation displayed with a bar
%
%            .mat file named FILENAME_area_eccentricity_perimeter giving data 
%            regarding nucleus in the image
%
%            .mat file named FILENAME_summary file containing averages for parameters of nuclei 
%            over an entire coverslip (all images selected at start)
%
%            J. Core  03/01/17

clear all
warning off images:initSize:adjustingMag
% Determine whether to save outputs
yesorno = input('Save Outputs? 0 = Yes, 1 = No \n');

% Conversion factor between image pixels and microns. Equals number of pixels
% in one micron
conversion_factor = 6.24; 

pathfiles = 'E:\Jason\Final Testing\New folder9';
% Ask user to select files
[file,path]=uigetfile({'*.TIF';'*.*'},'Select Images...', pathfiles,'MultiSelect','on');

% Set default threshold for all images 
default_thresh = input('Enter default threshold for all images (0.4-1.1 recommended): ');

% Set case where input is multiple picture files, remember to cite later
NumFiles = length(file);

if iscell(file)
    NumFiles = length(file);
    for i=1:NumFiles
        temp = file{i};
        FileIndex{i} = temp;
    end
else
    NumFiles = 1;
    FileIndex{1} = file;
end

% Initialize matrix to contain parameters of nuclei of all images
yesorno2 = 1;
properlynamed = 1;
nonzero_orientation_angles_coverslip = [];
areas_total = [];
eccentricities_total = [];
perimeters_total = [];
excluded_files_count = 0;
excluded_files = [];

% Read image and store image name
for uu = 1:NumFiles
    customvalues = 0;
    [pathsr, name, ext] = fileparts(FileIndex{uu});
    filename = [path FileIndex{uu}];
    pathsr = path;
    A = imread(filename);
    
    % Check if images are colored 
    if size(A,3) == 3
        A = rgb2gray(A);
    end
    
    % Initialize variables
    validcheck = 0;
    throwout = 0;
    exclude_numbers = 1000;
    double_nucleus_check = 0;
    threshscale = default_thresh;
    npoints = 100; % Set number of points to calculate curvature for concavity detection. Controls detection of multiples, segmentation and number of dents
    
    while validcheck < 1;
        close all
        clear MPC_fov_initial num_indents_initial MSE_fov_initial test2 mean_positive_curvature
        % Create variables in image detection
        npoints2 = 25; % Set number of points to fit circle to calculate curvature. Controls MPC
        curve_threshold = .02;
        
        % Adjust the image intensity
        G=imadjust(A);
        G_size = size(G);
        
        % Convert image to black and white, fill in holes, and create matrix of 
        % X and Y values for each body.
        level = threshscale*graythresh(G);
        level2 = threshscale*graythresh(G);
        BW = im2bw(G,level);
        BW = imfill(BW,'holes');
        % Display original image
        %warning off images:initSize:adjustingMag
        imshow(G); hold on;
        %warning off images:initSize:adjustingMag
        
        % Begins new boundary extraction from image if previous data not
        % used 
        [B,L] = bwboundaries(BW,'noholes');
        % Use regionprops to calculate orientation of bodies
        regions = regionprops(BW, 'Area', 'Perimeter');

        % Create regular vector to store area values so that they can be 
        % removed more easily
        for counter = 1:length(regions)
            TempArea(counter) = regions(counter).Area;
            TempPerimeter(counter) = regions(counter).Perimeter;
        end
        TempArea = TempArea';
        TempPerimeter = TempPerimeter';

        % Convert areas of objects from pixels to micrometers
        TempArea = TempArea;
        TempPerimeter = TempPerimeter;
        
        % Remove any body with a perimeter of less than 8 microns
        micron_limit = 49.92/conversion_factor;
        remove_indices_2 = find(TempPerimeter<micron_limit);
        TempArea(remove_indices_2) = [];
        TempPerimeter(remove_indices_2)= [];
        B(remove_indices_2) = [];
            
        % Initialize variable used to keep track of number of outlines on
        % edge excluded
        increment = 0;
        % Initialize variable used to keep track of whether an outline
        % should be excluded
        Edgecheck = 0;

        % Remove bodies on edge of picture
        for i_counter = 1:(length(B)-increment)
            xy_points = cell2mat(B(i_counter-increment));
            x_points = xy_points(:,1);
            y_points = xy_points(:,2);
            if sum(y_points >= G_size(2))==0 && sum(y_points == 1)==0 && sum(x_points == 1)==0 && sum(x_points >= G_size(1))==0
            else
                % Store outlines designated as touching the edge for use
                % later in voronoi diagram
                Edgepoints(increment+1) = B(i_counter-increment);

                % Remove all other data regarding outlines on edge from
                % storage
                B(i_counter-increment) = [];
                TempArea(i_counter-increment)= [];
                TempPerimeter(i_counter-increment)= [];
                increment = increment+1;
                Edgecheck = 1;
            end
        end

        if Edgecheck == 0
            Edgepoints = [];
        end

        % Determine average area of the bodies in an image other
        % eliminations
        avg_area = mean(TempArea);

        % Remove bodies based on area
        remove_indices_3 = find(TempArea<avg_area/3);
        TempArea(remove_indices_3) = [];
        TempPerimeter(remove_indices_3)= [];
        B(remove_indices_3) = [];
       
        % Create variable to account for segmentation increasing number of bodies
        valid_nucleus = [];
        
        % Get each valid nucleus outline in matrix B and calculate mean curvature
        B = BoundaryRefine(A,B,level2);
        
        % Create struct variable to contain X and Y values of bodies
        struct_size = size(B,1);
        clear xy_values;
        xy_values(struct_size) = struct();
        clear ellipse_parameters;
        ellipse_parameters(struct_size) = struct();
        
        figure(1)
        for i = 1:length(B) 
            % Convert X and Y cells into mat
            test = cell2mat(B(i,1));
            test2(i).xypairs = test;
            x_values = test(:,1);
            y_values = test(:,2);

            % Check for significant concavities

            % Evaluate curvature along the outline of the body 
            outline = [x_values y_values];
            
            % Calculate curvature using polynomial fitting
            curve = curvature(outline(:,1),outline(:,2), 3, npoints, npoints);
            curve_radius = curvature_circle(outline(:,1),outline(:,2), 3, npoints2, npoints2);
            
            % Save values of outline curvature from poly fitting into new
            % variable
            curve_values(i).curve = curve;
    
            % Save values of outline curvature from circle fitting into new
            % variable
            curve_radius_values(i).curve = curve_radius;
            
            % Find all values of positive curvature in the outline
            % curvature from circle fitting
            curvature_radius_placehold = curve_radius;
            positive_curvature = curvature_radius_placehold(find(curve_radius_values(i).curve>curve_threshold));
            
            % Calculate the mean of positive curvature values
            mean_positive_curvature(i) = mean(positive_curvature);
        end
        
        % Turn value of mean positive curvature from NaN to 0 for any
        % outline with no positive curvature to make valid
        mean_positive_curvature(find(isnan(mean_positive_curvature))) = 0;
            
        % Save MPC value for each nucleus into one variable
        MPC_fov_initial = mean_positive_curvature;
       
        % Calculate standard deviation of mean positive curvature across FOV
        %mean_positive_curvature(isnan(mean_positive_curvature)) = [];
        mean_mean_positive_curvature = mean(mean_positive_curvature);
        stddev = std(mean_positive_curvature);
        
        %Initialize struct array for outlines of multiple nuclei
        Multiplenuclei(1).xypairs = [0,0];
        multiple_indices = [];
       
        defect_numbers = [];
        for ii = 1:length(B) 
            % Reset bleb check
            blebcheck = 0;
                % Clear indices so overlap does not occur
                % 'indices, indices2, and indices3 gives the indices of points in the nucleus
                % outline where curvature spikes and becomes positive,
                % indicating a disruption in smoothness of outline
                clear indices indices2 indices3 
                
                %get x and y points of each outline
                test = test2(ii).xypairs;
                x_values = test(:,1);
                y_values = test(:,2);

                % Identify points of positive and negative curvature
                
                % Get polynomial fit curvature values for an outline
                curve = curve_values(ii).curve;
                curve_index = curve > .003;
                indices = find(curve_index == 1);
                positive_curve = curve > curve_threshold;
                negative_curve = curve <= curve_threshold;
                positive_indices = find(positive_curve == 1);
                negative_indices = find(negative_curve == 1);
                
                % Get circle fit curvature values for an outline
                curve_radius = curve_radius_values(ii).curve;
                
                % Get indices for positive & negative circle fit curvature values
                positive_curve_radius = curve_radius > curve_threshold;
                negative_curve_radius = curve_radius <= curve_threshold;
                positive_indices_radius = find(positive_curve_radius == 1);
                negative_indices_radius = find(negative_curve_radius == 1);
                
                % num_PC_points stores indices of points which are local
                % maxima of positive curvature. If there are none, it is 0
                if isempty(indices)
                    num_indents_initial(ii) = 0;
                else
                    % narrow down list of indices of points of positive curvature to
                    % only those which are local maxima, so that one point
                    % corresponds to each disruption in curvature
                    indices2 = indices;
                    max1 = indices(1);
                    max_index = 1;
                    for increment  = 2:length(positive_indices)
                        % Scans along list of indices and compares points 
                        % close together on the nucleus outline.
                        if positive_indices(increment)-positive_indices(increment-1)<length(outline)/20
                            % Removes indices of point with smaller
                            % curvature value, until only the point with
                            % the maximum value in each peak remains
                            if curve(positive_indices(increment))<=max1
                                indices2(increment) = 0;
                           else
                               indices2(max_index) = 0;
                               max_index = increment;
                               max1 = indices(increment);
                            end
                        else
                            max1 = positive_indices(increment);
                        end
                    end
 
                    % Clear out the 0's corresponding to non-maximum
                    % points, only store the indices of maxima
                    inc = 0;
                    for increment2 = 1:length(indices2)
                        if indices2(increment2) ~= 0
                            inc = inc + 1;
                            indices3(inc) = indices2(increment2);
                        end

                    end
                    % Plot points of negative curvature over threshold
                    num_indents_initial(ii) = length(indices3);
                end
                
                % Clear indices to not interfere with finding indices of
                % next nucleus
                clear indices2 indices3
                
                % Find the points of maximum curvature
                curve_index = curve > .005;
                indices = find(curve_index == 1);
                
                % Check if object has been designated for removal and is
                % not already a double nucleus
                
                 if ~isempty(find(ii==exclude_numbers)) 
                    xy_values(ii).xypairs = test;
                    valid_nucleus(ii) = 0;
                    plot(y_values, x_values, 'r-', 'LineWidth', 2)
                    continue
                end
                
                % Record and plot nucleus if no significant concavities
                % found
                if isempty(indices) 
                    xy_values(ii).xypairs = test;
                    valid_nucleus(ii) = 1;
                    plot(y_values, x_values, 'g-', 'LineWidth', 2)
                    continue
                end
             
                % narrow down list of indices of points of positive curvature to
                % only those which are local maxima, so that one point
                % corresponds to each disruption in curvature
                indices2 = indices;
                max1 = indices(1);
                max_index = 1;
                for increment  = 2:length(indices)
                    % Scans along list of indices and compares points 
                    % close together on the nucleus outline. 
                    if indices(increment)-indices(increment-1)<length(outline)/20
                        % Removes indices of point with smaller
                        % curvature value, until only the point with
                        % the maximum value in each peak remains
                        if curve(indices(increment))<=max1
                           indices2(increment) = 0;
                        else
                           indices2(max_index) = 0;
                           max_index = increment;
                           max1 = indices(increment);
                        end
                    else
                        max1 = indices(increment);
                    end
                end

            % Clear out the 0's corresponding to non-maximum
            % points, only store the indices of maxima
            inc = 0;
            for increment2 = 1:length(indices2)
                if indices2(increment2) ~= 0
                    inc = inc + 1;
                    % Indices3 contains the indices of points which are
                    % local maxima in positive curvature, each
                    % corresponding to a disruption in nucleus boundary
                    % curvature
                    indices3(inc) = indices2(increment2);
                end

            end
           
           % Requires more than 1 peak of positive curvature to recognize
           % as double nucleus
           if length(indices3) <= 1 
               % Save outline of nucleus designated as single and valid
               xy_values(ii).xypairs = test;
               valid_nucleus(ii) = 1;
               % Plot values of positive and negative curvature as diff.
               % colors
               
               % Only plot boundaries as 1 color
               plot(y_values, x_values, 'g-', 'LineWidth', 2)
           else
               valid_nucleus(ii) = 0;
               xy_values(ii).xypairs = test;
               plot(y_values, x_values, 'r-', 'LineWidth', 2)
           end
        end
       
    
        % Access one set of x and y pairs from the struct array
        for i = 1:length(xy_values)
            test1 = xy_values(i).xypairs; 
            x_values = test1(:,1);
            y_values = test1(:,2);
            
            % Area & perimeter calculated for each nucleus 
            [geom, geom2, geom3] = polygeom(x_values,y_values);
            
            % Area & perimeter of each nucleus converted from pixels to um (or um^2) before saving into
            % struct.
            areas(i) = geom(1)/conversion_factor^2;
            perimeters(i) = geom(4)/conversion_factor;
            
            % Fit ellipse to X and Y values, calculating parameters of the
            % ellipse
            values = 1:8;
            values = ellipsefit(x_values,y_values);
           
            
            % Store values related to fitted ellipse
            t = 0:.01:2*pi;
            x_1 = values(1);
            y_1 = values(2);
            values(3) = values(3)/conversion_factor;
            a1 = values(3);
            values(4) = values(4)/conversion_factor;
            b1 = values(4);
            values(6) = sqrt(1-(b1^2/a1^2));
            values(7) = areas(i);
            values(8) = perimeters(i);
            theta = values(5);
            if values(5) < 0
               values(5) = values(5) + pi;
            end
            
            % Create vectors corresponding to x and y values of points on
            % fitted ellipse
            x = x_1 + (a1*cos(t)*cos(theta)-b1*sin(t)*sin(theta))*conversion_factor;
            y = y_1 + (a1*cos(t)*sin(theta)+b1*sin(t)*cos(theta))*conversion_factor;
            xy_points = [x' y'];
                
            % Save parameters of each ellipse fitted to a body, as well as
            % its points
            ellipse_parameters(i).parameters = values;
            ellipse_parameters(i).outline = test1;
        end

        % Plot nuclei arrows
        for n=1:length(ellipse_parameters)
            % Set center of arrow as centroid of nucleus/fitted ellipse
            center = ellipse_parameters(n).parameters;
            h=text(center(2),center(1),num2str(n));
            set(h,'color','r');
            
            % Use calculated ellipse parameters to create best-fitting
            % arrow
            stats = ellipse_parameters(n).parameters;
            
            h=annotation('line');
            set(h,'parent',gca);
            angle = stats(5)*180/pi+90;
            if stats(3) > stats(4)
                majaxis = stats(3)*conversion_factor;
            else
                majaxis = stats(4*conversion_factor);
            end
            majaxis = majaxis*1.5;
            centroid = stats(1:2);
                
            if valid_nucleus(n) == 1
                % Math for setting length & orientation of arrow based on
                % ellipse parameters
                h=annotation('line');
                set(h,'parent',gca);
                set(h,'x',[(centroid(2)+majaxis*.8*cos(angle*pi/180)) (centroid(2)-majaxis*.8*cos(angle*pi/180))]);
                set(h,'y',[(centroid(1)-(majaxis*.8*sin(angle*pi/180))) (centroid(1)+(majaxis*.8*sin(angle*pi/180)))]);
                set(h,'Color','r');
            end
        end

        hold off;
        
        % Show raw nuclei image with nothing plotted
        figure(2) 
        imshow(G)
        % Show nuclei image converted to binary based on threshold
        figure(3)
        imshow(BW)
      
        % Prompt user to re-analyze with different values or accept image
        figure(1)
        w = input('Accept Values? (yes = 0, no: input new threshold =  1, input new overlap detection constant = 2 throw out objects = 6,\n throw out image = 13, reset = 22): ');
        if w == 0 
            disp('Image Values accepted' )
            validcheck = 1;
        % Option for throwing out image and designating its data as invalid, but still saving
        elseif w == 13
            validcheck = 1;
            throwout = 1;
            excluded_files_count = excluded_files_count + 1;
            excluded_files(excluded_files_count).name = name;
        % Option for designating specific nuclei to manually exclude from
        % analysis
        elseif w == 6
            exclude_numbers = str2num(input('Enter object numbers to exclude: ', 's'));
            final_exclusion_indices = double_nucleus_check;
            defect_numbers = [];
            disp('Re-analyze imaging...')
        % Option for resetting all conditions and re-analyzing image with default
        % settings
        elseif w == 22
            threshscale = default_thresh;
            npoints = 40;
            customvalues = 0;
            clear multiple_indices  
            defect_numbers = [];
            exclude_numbers = [];
        % Option for re-analyzing under different threshold and
        % segmentation constant
        elseif w == 2
            disp('Re-analyze imaging...')
            customvalues = 1;
            clear MPC_fov_initial MSE_fov_initial num_indents_initial
            disp(['Values set: Initial threshold = ' num2str(threshscale) ' and Overlap Detection Value = '  num2str(npoints)])
            npoints = input('Enter Overlap Detection Value (70-200 recommended, more points = less automatic exclusion) ');
            if npoints < 8
                disp('Enter a number greater than or equal to 8')
                npoints = input('Enter Overlap Detection Value (70-200 recommended, higher value = less detection) ');
            end
        else 
            disp('Re-analyze imaging...')
            customvalues = 1;
            clear MPC_fov_initial MSE_fov_initial num_indents_initial
            disp(['Values set: Initial threshold = ' num2str(threshscale) ' and Overlap Detection Value = '  num2str(npoints)])
            threshscale = input('Enter Threshold (0.5-1 recommended): ');
            if threshscale > 2
                disp('Enter lower number./n')
                threshscale = input('Enter Threshold (0.5-1 recommended): ');
            end
        end
    end
    
    % Initialize matrices for valid nuclei data
    xy_values_final = [];
    ellipse_parameters_final = [];
    clear areas perimeters 
    
    % Separate valid nuclei data from excluded nuclei data
    counts2 = 0;
    counts3 = 0;
    for counts = 1:length(valid_nucleus)
        if valid_nucleus(counts) == 1
            counts2 = counts2 + 1;
            xy_values_final(counts2).xypairs = xy_values(counts).xypairs;
            ellipse_parameters_final(counts2).parameters = ellipse_parameters(counts).parameters;
            B_new(counts2) = B(counts);
        else
            counts3 = counts3 + 1;
            xy_values_excluded(counts3).xypairs = xy_values(counts).xypairs;
            ellipse_parameters_excluded(counts3).parameters = ellipse_parameters(counts).parameters;
            B_excluded(counts3) = B(counts);
        end
    end
        
    % Creating orientation matrix and Voronoi diagram
    orientim_perp(1:size(G,1),1:size(G,2)) = 0;
    for m=1:length(ellipse_parameters_final)
        stats = ellipse_parameters_final(m).parameters;
        angle = stats(5);
        if angle < 0
            angle = angle + pi;
        end
        % Place orientation angle values of each nucleus into 
        % the orientim_perp matrix, which has the same dimensions as 
        % the image         
        orientim_perp(round(stats(1)),round(stats(2))) = angle+2*pi;
            
        % Store coordinates of centroid of each nucleus
        centroids(m,1) = stats(1);
        centroids(m,2) = stats(2); 
    end
        
    % Store the orientim_perp as voronoi_orientim_perp for saving in
    % voronoi input file
    voronoi_orientim_perp = orientim_perp;
    regionstats(1).Orientation_Matrix = orientim_perp;
    
    % Store original image in struct
    regionstats(1).Image = G;
    
    % Temporary method for combining ellipse_parameters and regionstats in order 
    % to create one struct to return
    for n=1:length(ellipse_parameters_final)
        values = ellipse_parameters_final(n).parameters;
        regionstats(n).Centroid = [values(1) values(2)];
        if values(5) < 0
            values(5) = values(5) + pi;
        end
        regionstats(n).Orientation = values(5);
        if values(3)>values(4)
            regionstats(n).MajorAxisLength = values(3);
        else
            regionstats(n).MajorAxisLength = values(4);
        end
    end
    
    % Store area and eccentricity of each nucleus 
    for ty = 1:length(ellipse_parameters_final)
        params = ellipse_parameters_final(ty).parameters;
        areas(ty) = params(7);
        perimeters(ty) = params(8);
        eccentricities(ty) = params(6);
    end
    
    % Eliminate dimensions of areas and perimeters being randomly flipped
    if size(areas,1) ~= 1
        areas = areas';
    end
    if size(perimeters,1) ~= 1
        perimeters = perimeters';
    end
    
    % Create matrices containing average parameters and all parameters of
    % each nucleus 
    if throwout == 0
        areas_total = [areas_total areas];
        perimeters_total = [perimeters_total perimeters];
        eccentricities_total = [eccentricities_total eccentricities];
    end
    
    % Calculate average parameters across a FOV
    avg_areas_fov(uu) = mean(areas);
    avg_eccentricities_fov(uu) = mean(eccentricities);
    avg_perimeters_fov(uu) = mean(perimeters);
    
    % Keep nonzero values of matrix of orientation angles
    orientation_fov = orientim_perp(:);
    nonzero_orientation_fov = orientation_fov(find(orientation_fov));
    nonzero_orientation_angles_fov = rad2deg(nonzero_orientation_fov);
    if throwout == 0
        nonzero_orientation_angles_coverslip = [nonzero_orientation_angles_coverslip; nonzero_orientation_angles_fov ];
    end
    orientation_voronoi_fov = voronoi_orientim_perp(:);
         
     % Convert radians to degrees
   nonzero_orientation_angles_fov = rad2deg(nonzero_orientation_fov);

    % Create new names for final image and .mat file
    string1 = [path name '_final_image'];
    string3 = [path name '_area_eccentricity_perimeter.mat'];
    string4 = [path 'summary'];
    string5 = [path name '_voronoi_input'];

    if yesorno == 0 && throwout == 0
        % Save FILENAME.mat file
        % Adjust Figure to Eliminate White Border in Saved Image
        figure(1)
        set(gca, 'position', [0 0 1 1], 'units', 'normalized')
        set(gcf, 'PaperUnits', 'inches', 'PaperPosition', [0 0 13.44 10.24]);
        print('-dtiff', string1, '-r100'); 
        %save (string5, 'orientim_perp', 'valid_nucleus', 'centroids', 'Edgepoints', 'ellipse_parameters');
        save (string3, 'B_new', 'areas', 'eccentricities', 'perimeters', 'nonzero_orientation_angles_fov', 'level2', 'throwout', 'conversion_factor');
    end
    
    % Clear all variables except necessary ones for the current image, move to next
    clearvars -except conversion_factor all_parameters excluded_files_count default_thresh image_colored excluded_files Edgepoints2 curve_values p voronoi_orientim_perp orientation_voronoi_fov properlynamed yesorno yesorno2 file file2 path path2 Numfiles Numfiles2 FileIndex FileIndex2 yesorno avg_areas_fov avg_eccentricities_fov avg_perimeters_fov string4 nonzero_orientation_angles_coverslip areas_total eccentricities_total perimeters_total imagedate stringg plate imagename curve_values
    
end

% Calculate average parameter values of nuclei across an entire coverslip
% at the end of a batch of images
avg_areas_coverslip = mean(areas_total);
avg_eccentricities_coverslip = mean(eccentricities_total);
avg_perimeters_coverslip = mean(perimeters_total);

% Save Summary File for Data Concerning Averages over all FOVs
if yesorno == 0 
save (string4, 'avg_areas_coverslip', 'avg_eccentricities_coverslip', 'avg_perimeters_coverslip', 'nonzero_orientation_angles_coverslip', 'areas_total', 'eccentricities_total', 'perimeters_total', 'excluded_files')
end
%clear all
%close all
warning on images:initSize:adjustingMag
msgbox('Operation Completed')


    
    
